# Supplementary material for: Catabolic Ornithine Carbamoyltransferase Activity Facilitates Growth of Staphylococcus aureus in Defined Medium Lacking Glucose and Arginine
Source: PubMed Central journal article supplement (PMC9239276; doi:10.1128/mbio.00395-22), 2022-04-27

# Growth in CDM-R

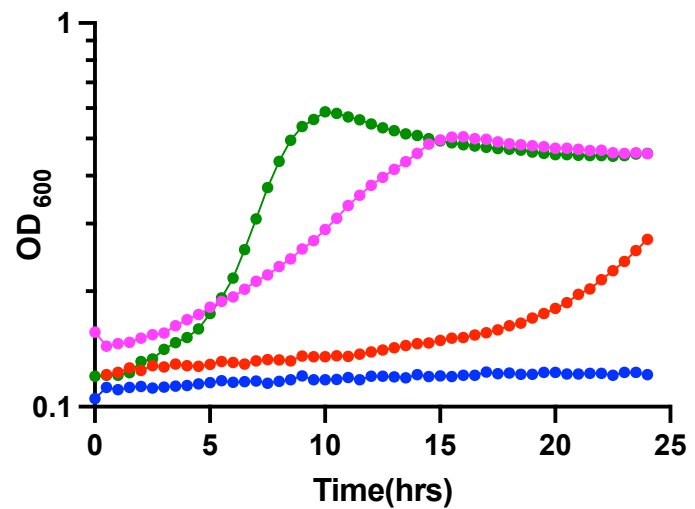

- JE2
- JE2 *putA::φNΣ*
- $\DeltaahrC$
- 12

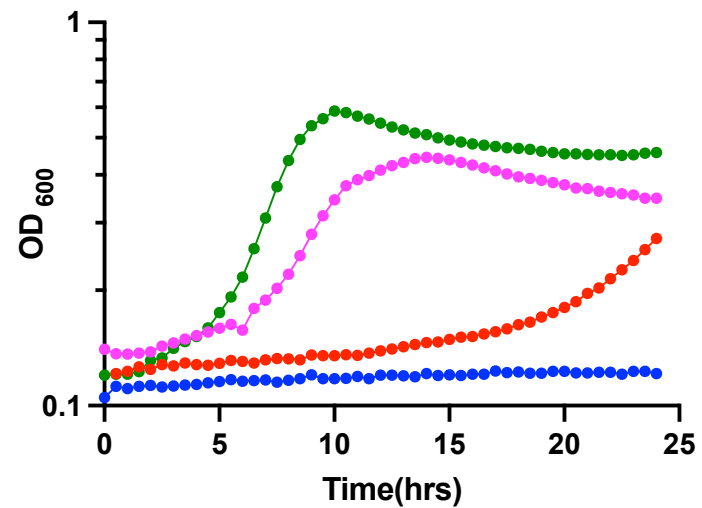

- JE2
- JE2 *putA::φNΣ*
- $\DeltaahrC$
- 5

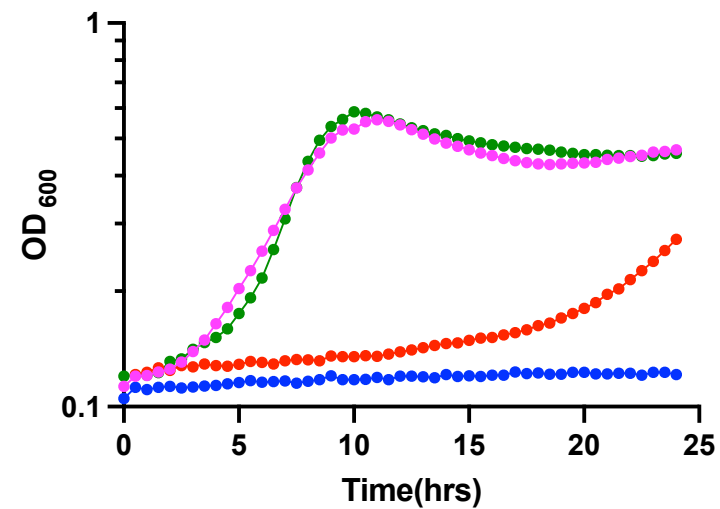

- JE2
- JE2 *putA::φNΣ*
- $\DeltaahrC$
- 8

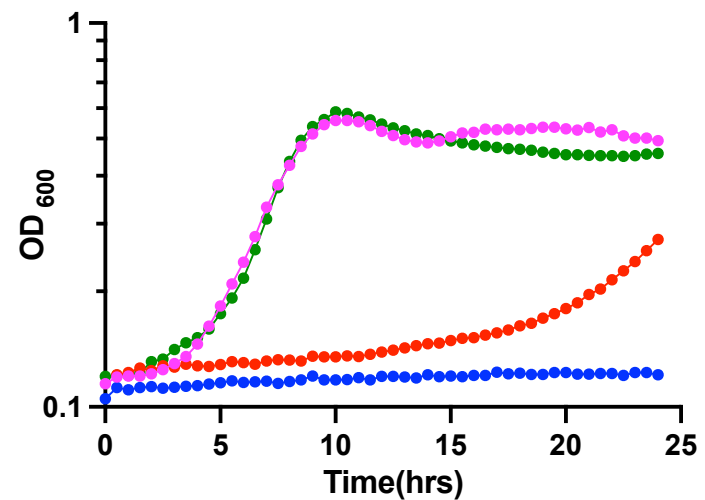

- JE2
- JE2 *putA::φNΣ*
- $\DeltaahrC$
- 4

# Growth in CDM-R

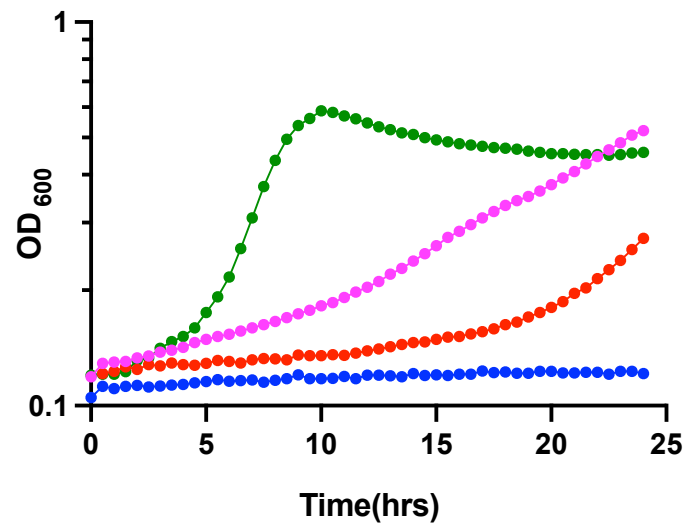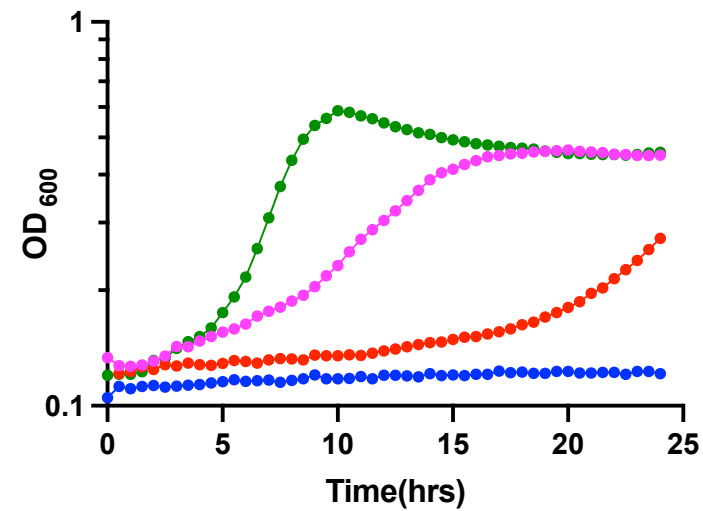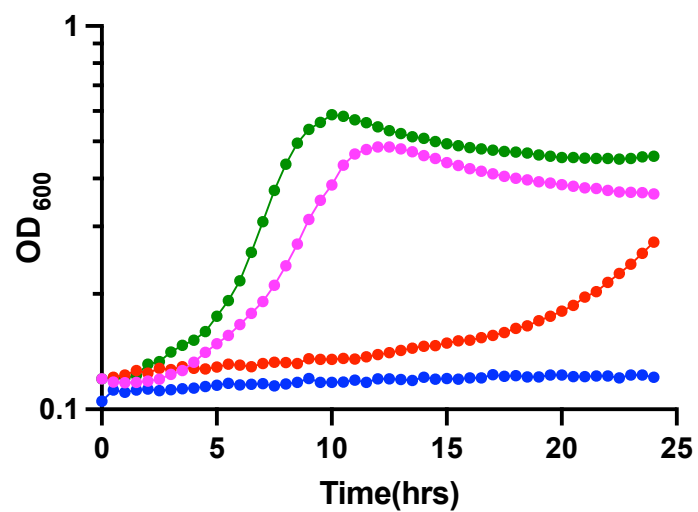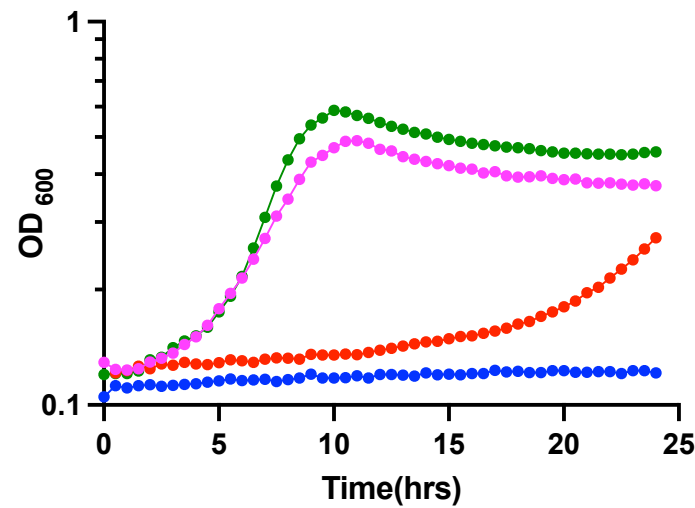

# Growth in CDM-R

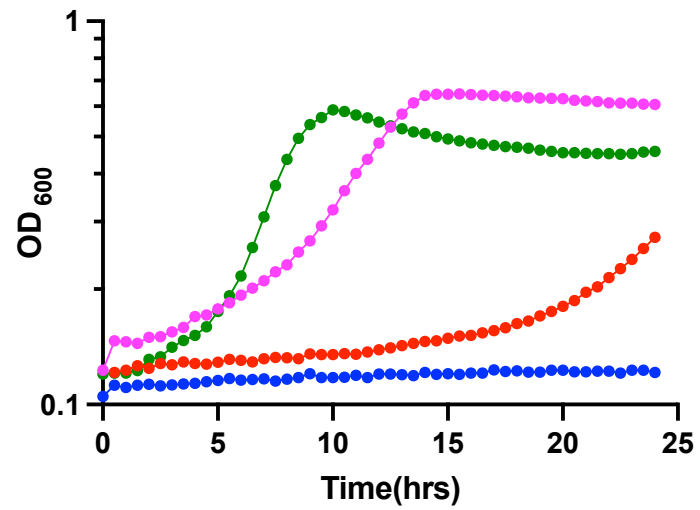

- JE2
- JE2 *putA::φNΣ*
- $\Delta$ *ahrC*
- 21

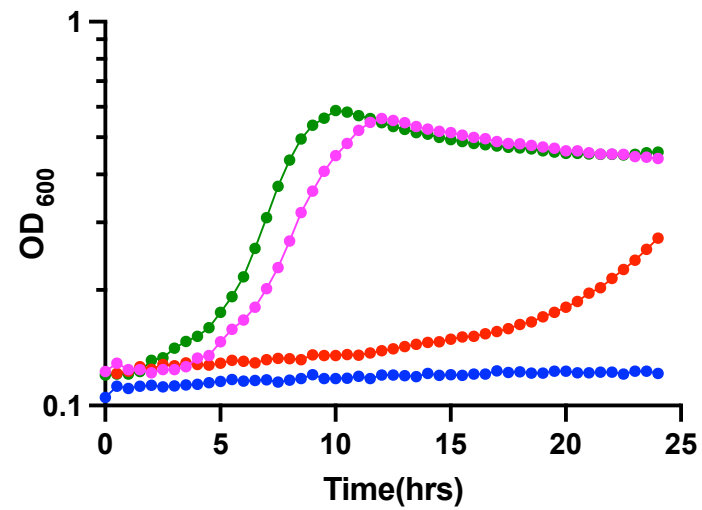

- JE2
- JE2 *putA::φNΣ*
- $\Delta$ *ahrC*
- 25

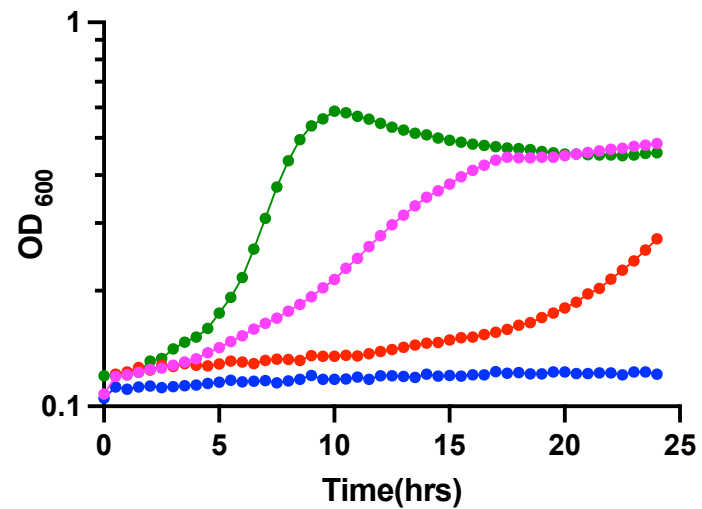

- JE2
- JE2 *putA::φNΣ*
- $\Delta$ *ahrC*
- 26

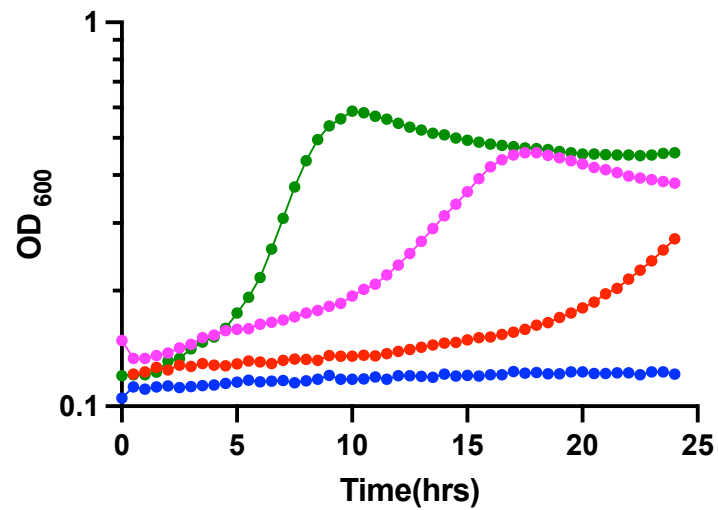

- JE2
- JE2 *putA::φNΣ*
- $\Delta$ *ahrC*
- 34

# Growth in CDM-R

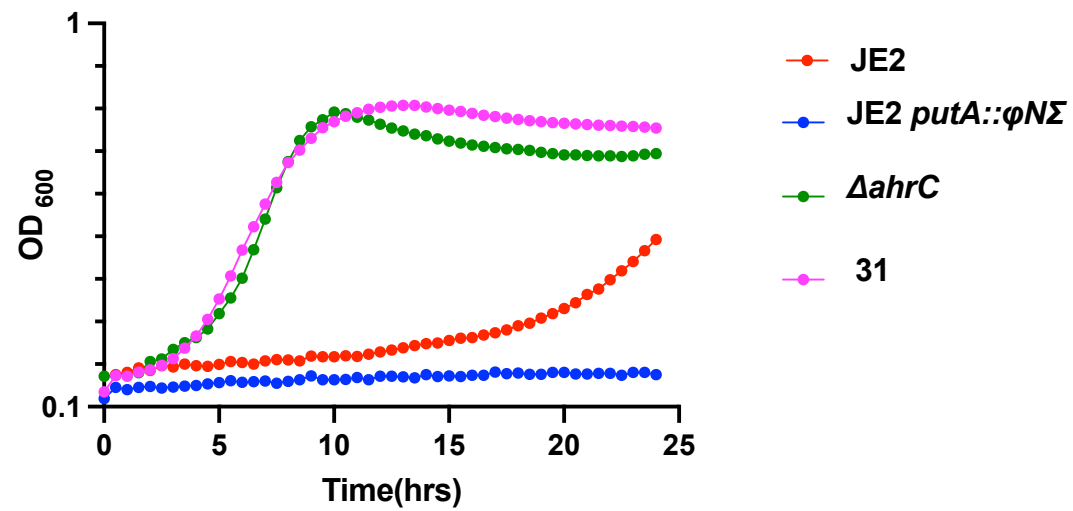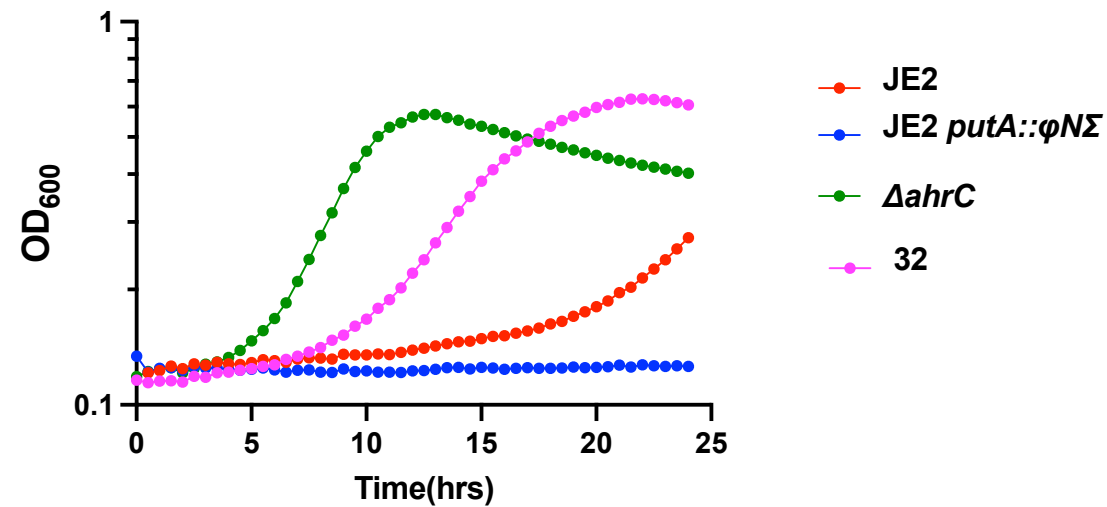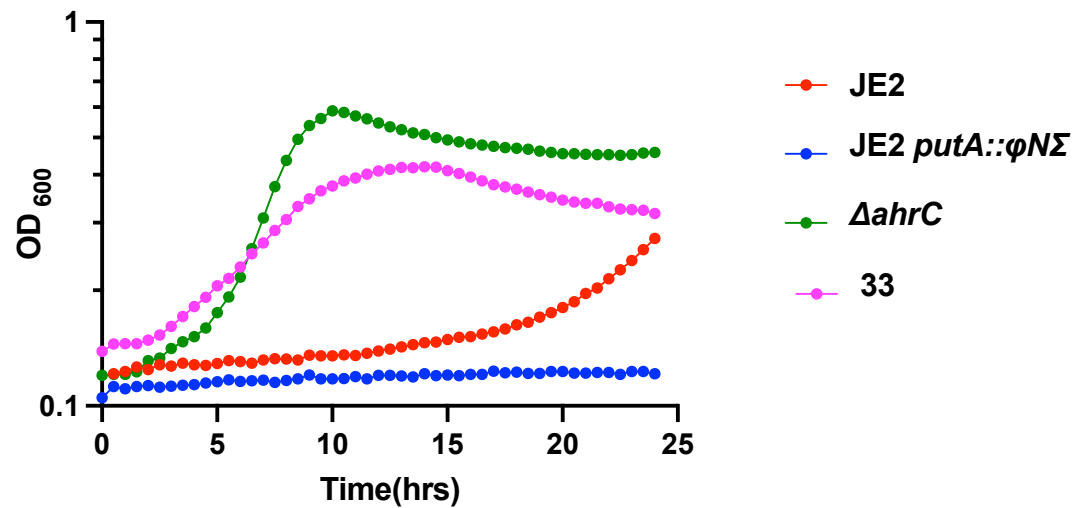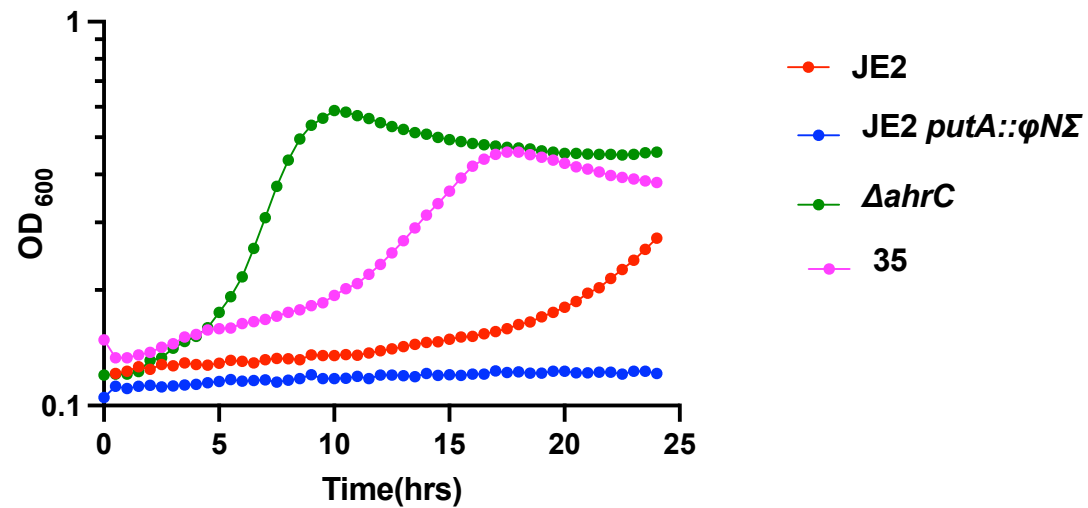

# Growth in CDM-R

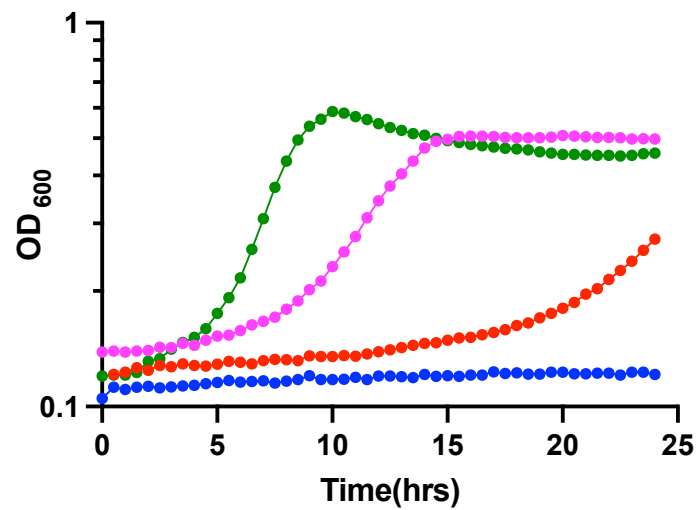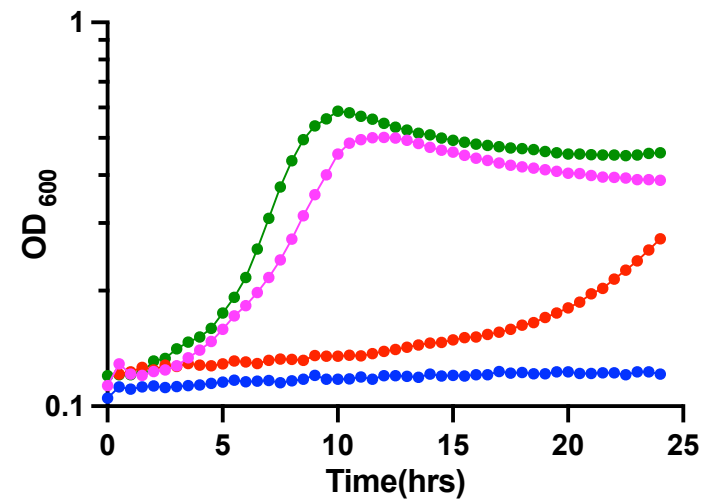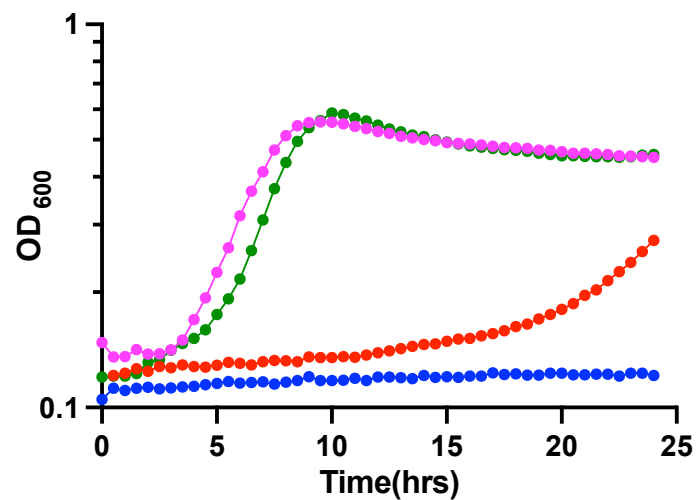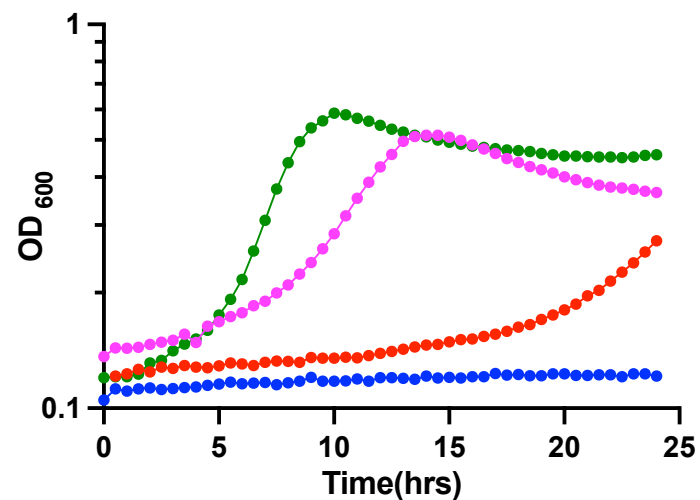

# Growth in CDM-R

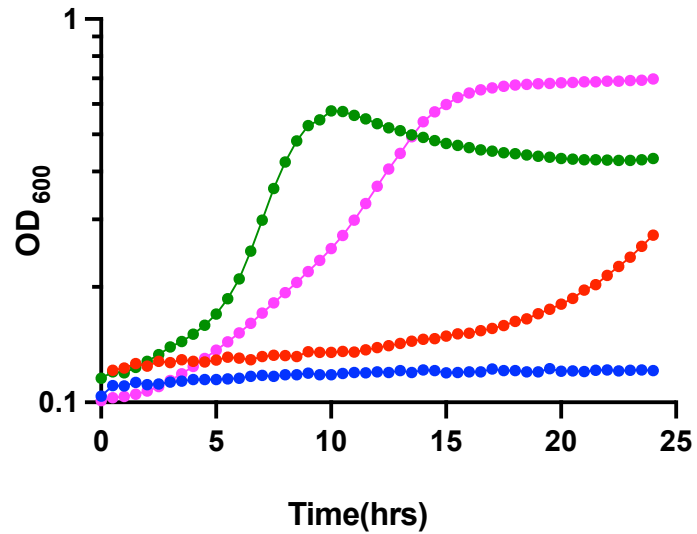

- JE2
- JE2 *putA::φNΣ*
- $\Delta$ *ahrC*
- 60

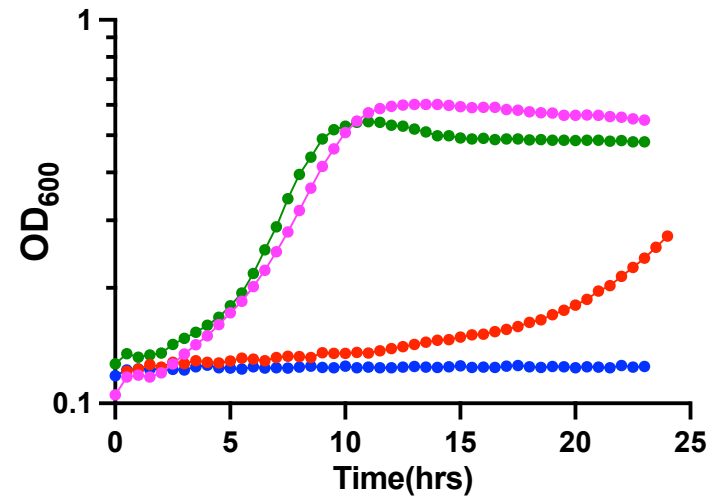

- JE2
- JE2 *putA::φNΣ*
- $\Delta$ *ahrC*
- 61

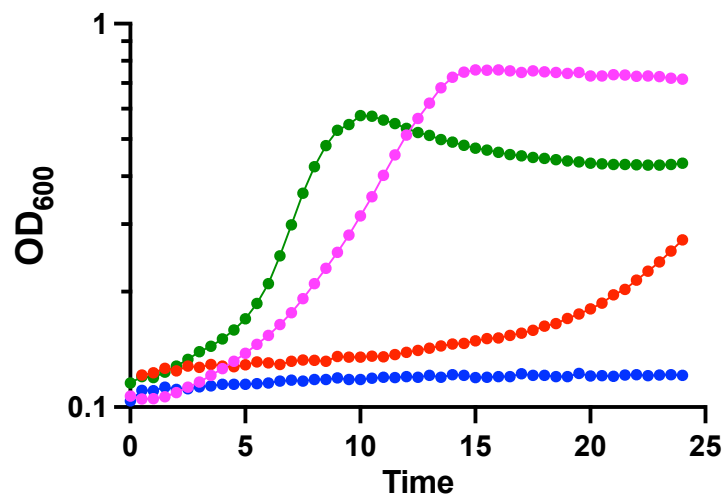

- JE2
- JE2 *putA::φNΣ*
- $\Delta$ *ahrC*
- 62

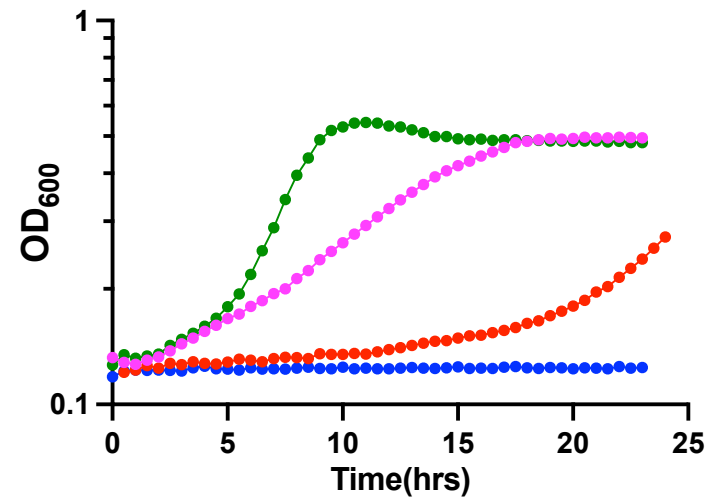

- JE2
- JE2 *putA::φNΣ*
- $\Delta$ *ahrC*
- 63

# Growth in CDM-R

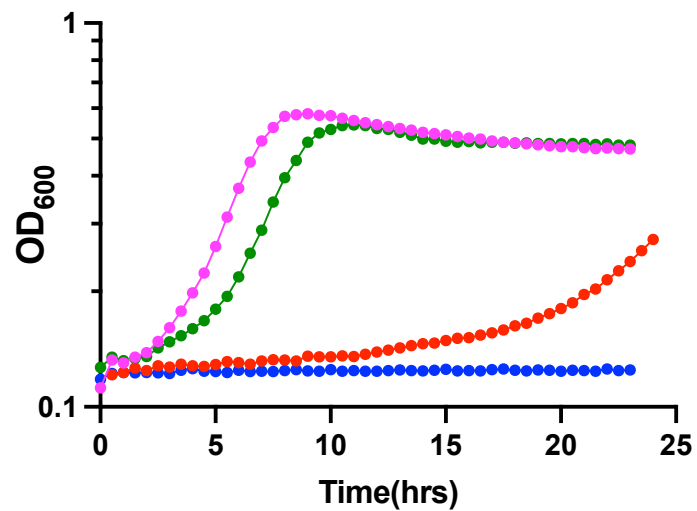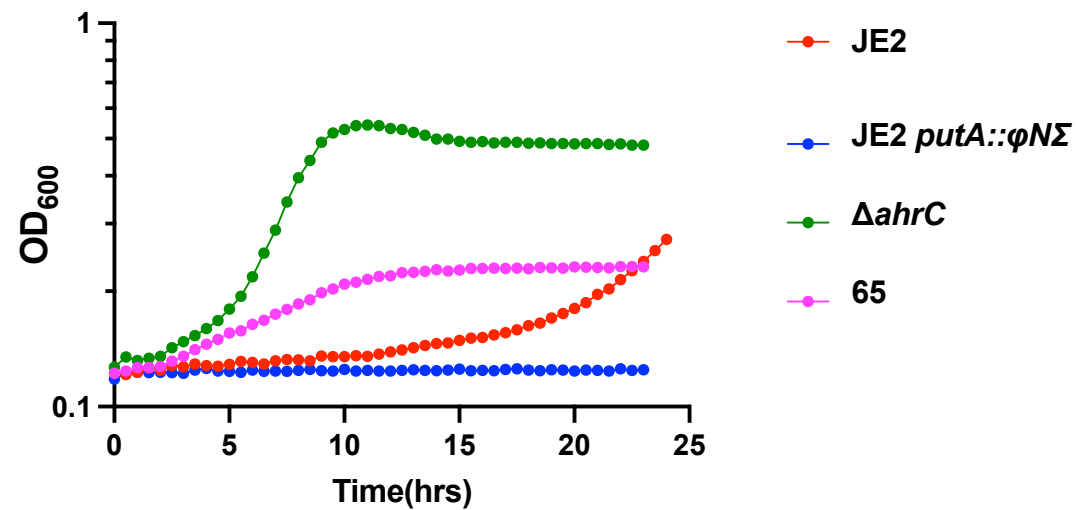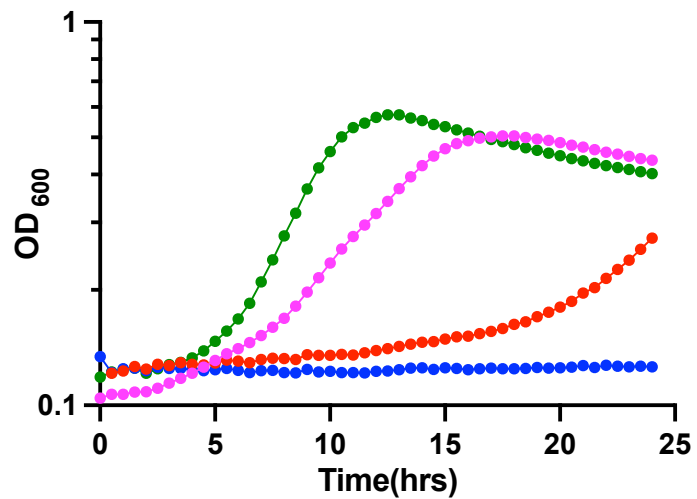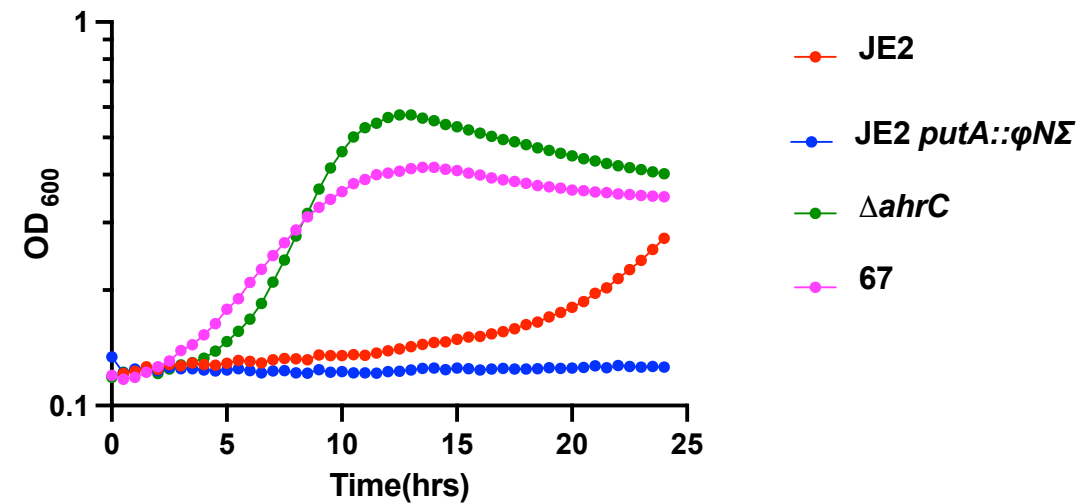

# Growth in CDM-R

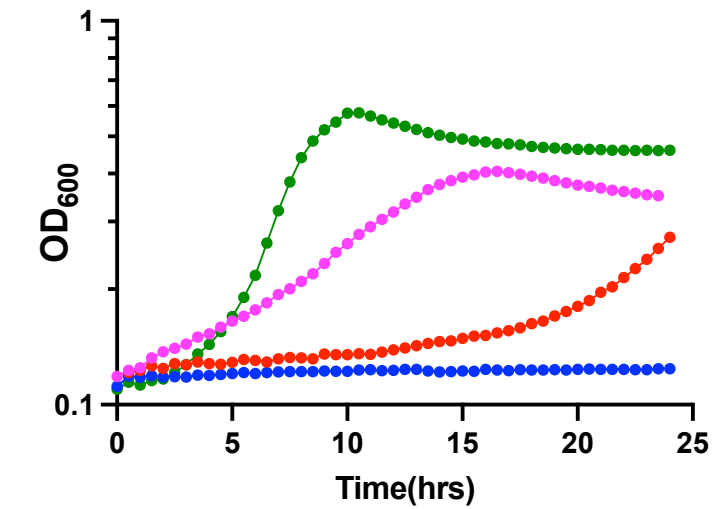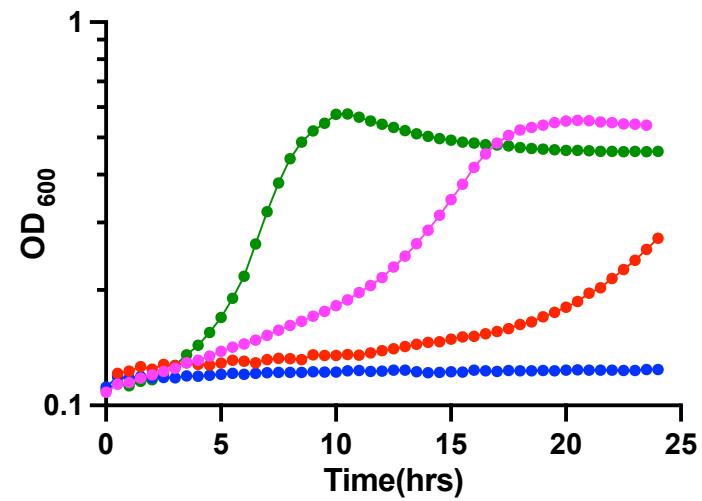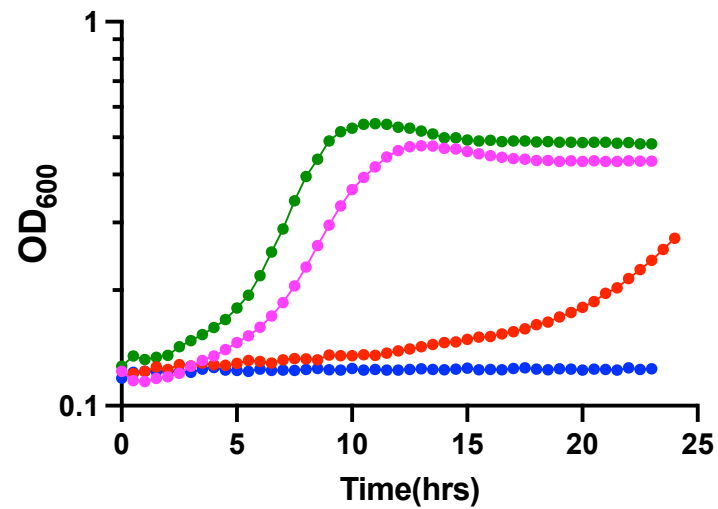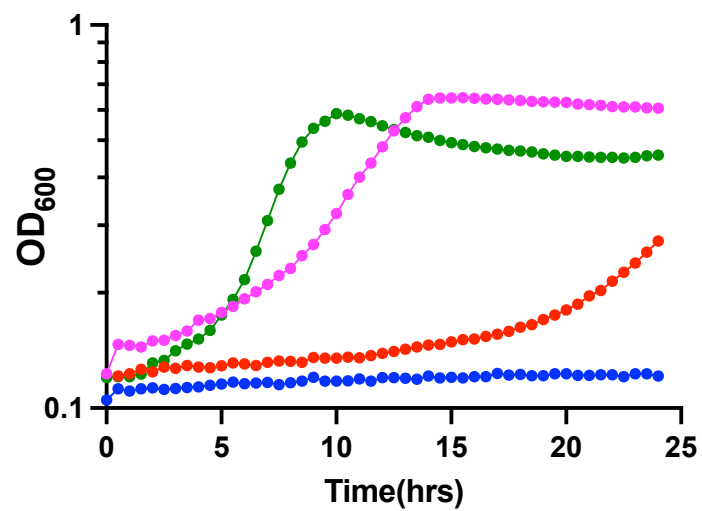



# Growth in CDM-R

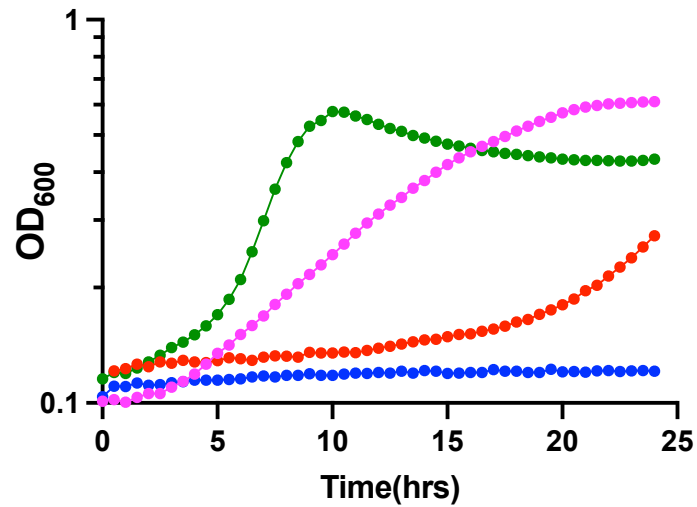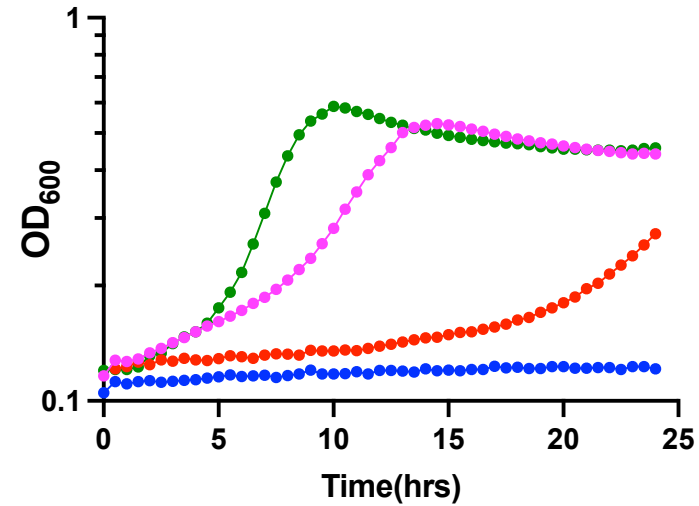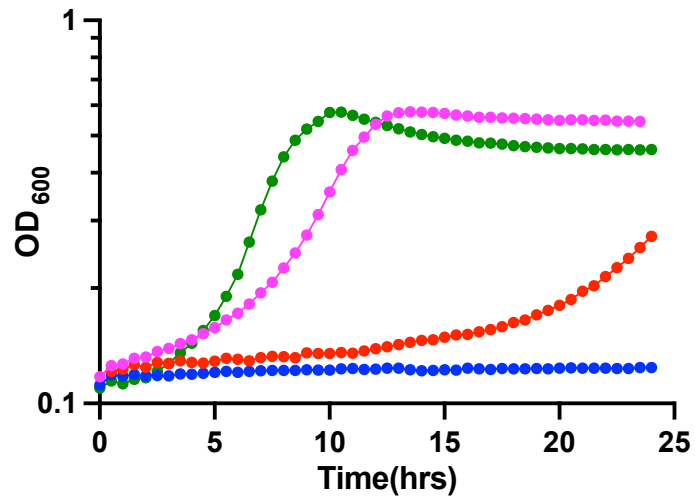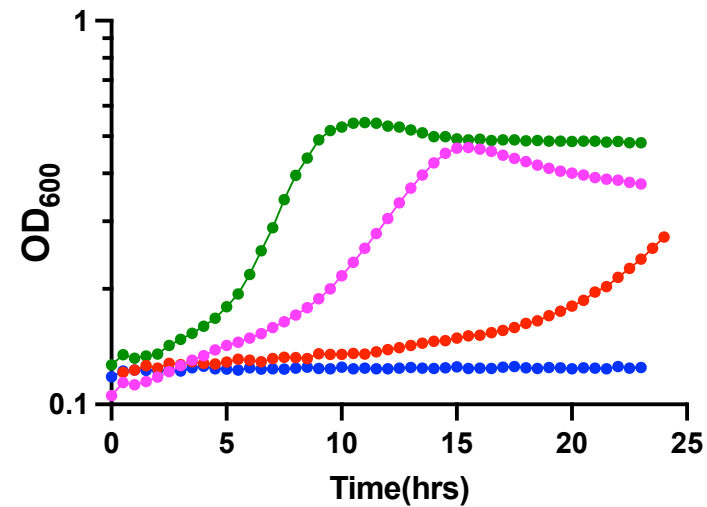

# Growth in CDM-R

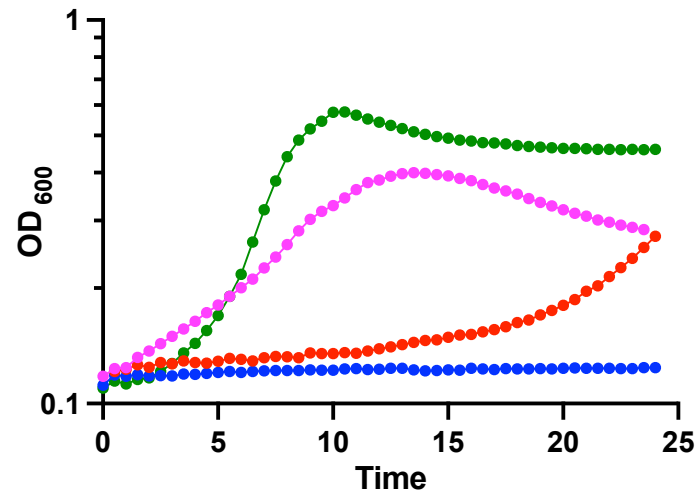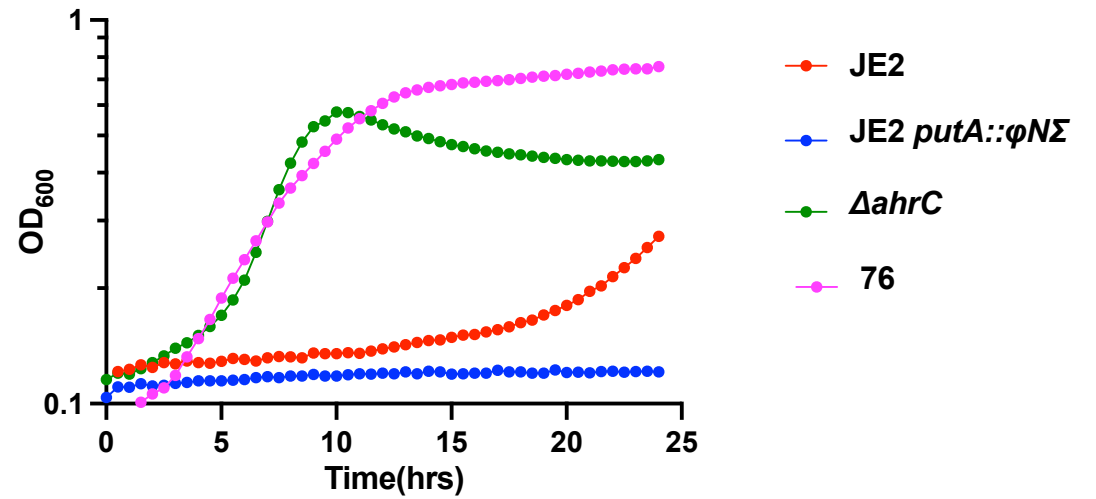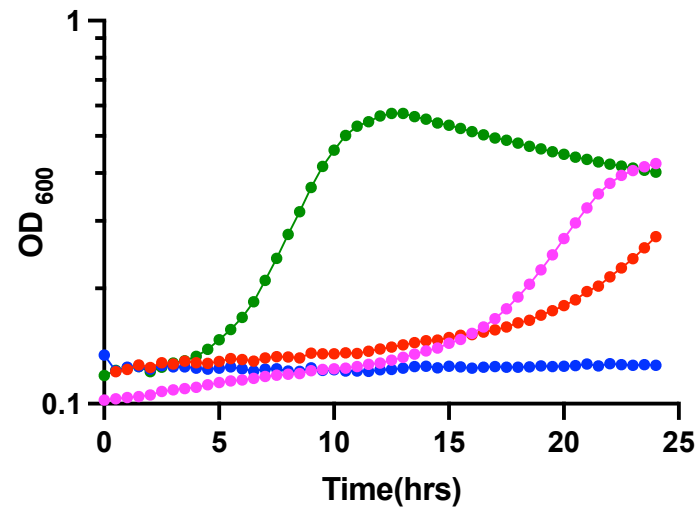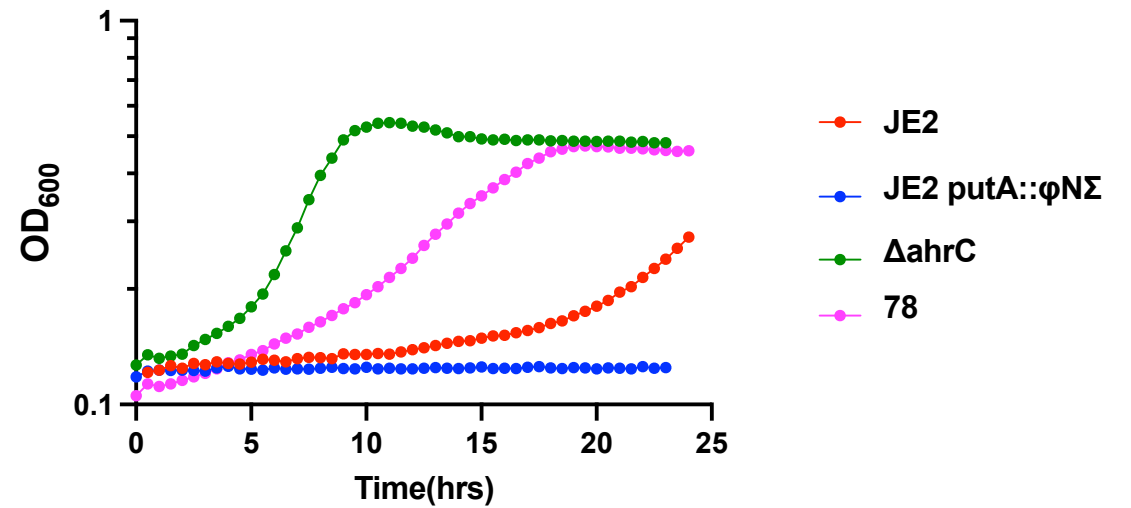

# Growth in CDM-R

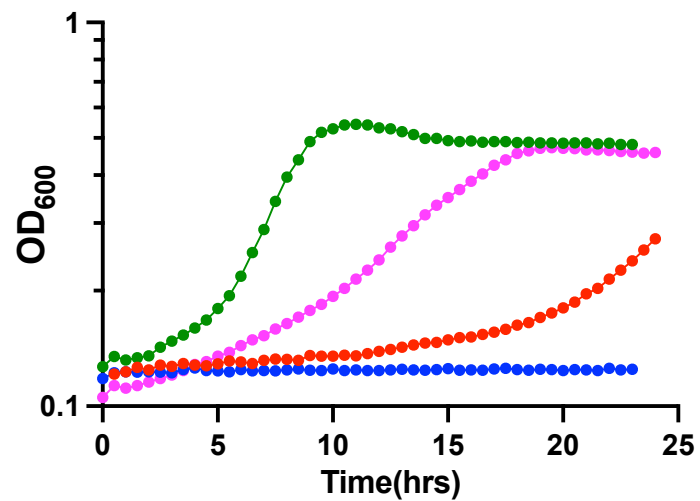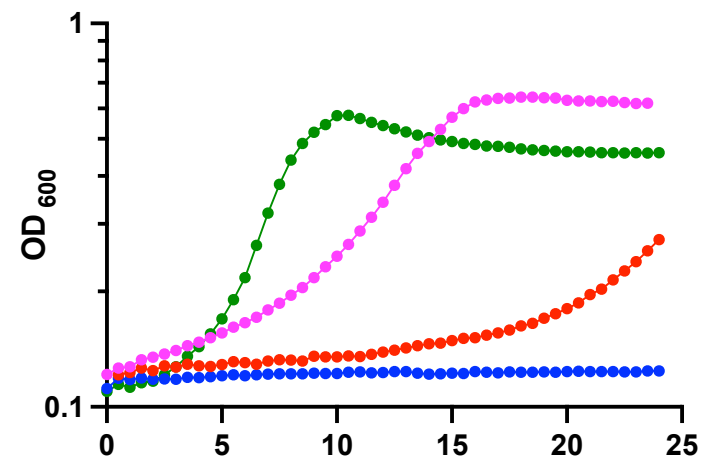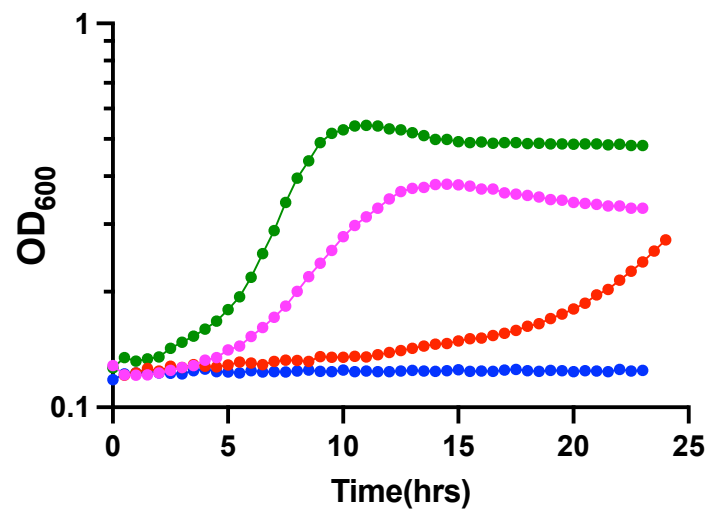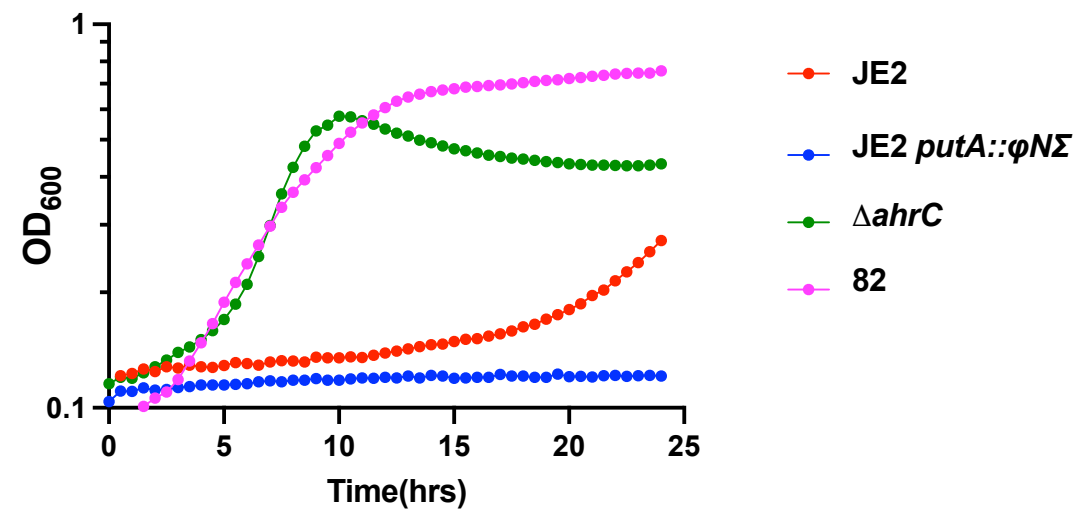

Supplement: mbio.00395-22-s0007.pdf [file mbio.00395-22-s0007.pdf]
