# Supplementary material for: Catabolic Ornithine Carbamoyltransferase Activity Facilitates Growth of Staphylococcus aureus in Defined Medium Lacking Glucose and Arginine
Source: PubMed Central journal article supplement (PMC9239276; doi:10.1128/mbio.00395-22), 2022-04-27
Supplement: mbio.00395-22-s0001.pdf [file mbio.00395-22-s0001.pdf]

Figure S1

|                                  |        |                                                           |
|----------------------------------|--------|-----------------------------------------------------------|
|                                  | 1      | 60                                                        |
| JE2                              | MPKKS  | VRHIKIREIISNEQIETQDELVKRLNDYDLNVTQATVSRDIKELQLIKVPIPSGQ   |
| JE2 <i>ahrC</i> <sub>C124F</sub> | MPKKS  | VRHIKIREIISNEQIETQDELVKRLNDYDLNVTQATVSRDIKELQLIKVPIPSGQ   |
| JE2 <i>ahrC</i> <sub>K4N</sub>   | MPK    | NSVRHIKIREIISNEQIETQDELVKRLNDYDLNVTQATVSRDIKELQLIKVPIPSGQ |
|                                  | 61     | 118                                                       |
| JE2                              | YVYSLP | NDRKFHPLEKLGRYLMDSFVNIDGTDNLLVLKTLPGNAQSIGAILDQINWEE      |
| JE2 <i>ahrC</i> <sub>C124F</sub> | YVYSLP | NDRKFHPLEKLGRYLMDSFVNIDGTDNLLVLKTLPGNAQSIGAILDQINWEE      |
| JE2 <i>ahrC</i> <sub>K4N</sub>   | YVYSLP | NDRKFHPLEKLGRYLMDSFVNIDGTDNLLVLKTLPGNAQSIGAILDQINWEE      |
|                                  | 119    | 150                                                       |
| JE2                              | VLGTIC | GDDTCLII CRSKEASDEIKSRIFNLL                               |
| JE2 <i>ahrC</i> <sub>C124F</sub> | VLGTI  | FGDDTCLII CRSKEASDEIKSRIFNLL                              |
| JE2 <i>ahrC</i> <sub>K4N</sub>   | VLGTIC | GDDTCLII CRSKEASDEIKSRIFNLL                               |
