# Supplementary material for: Catabolic Ornithine Carbamoyltransferase Activity Facilitates Growth of Staphylococcus aureus in Defined Medium Lacking Glucose and Arginine
Source: PubMed Central journal article supplement (PMC9239276; doi:10.1128/mbio.00395-22), 2022-04-27

Figure S2

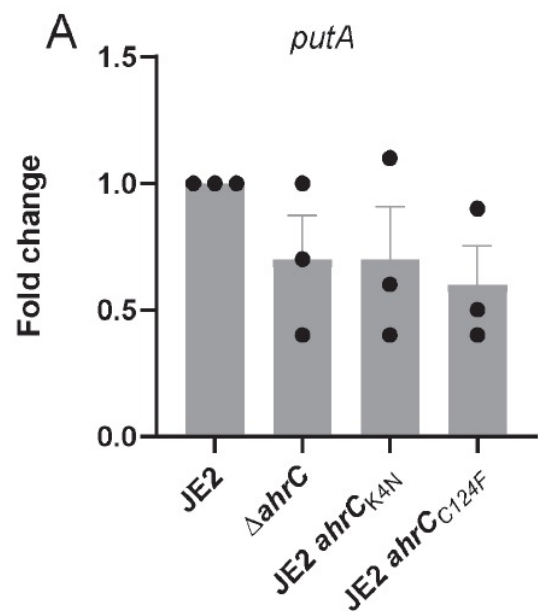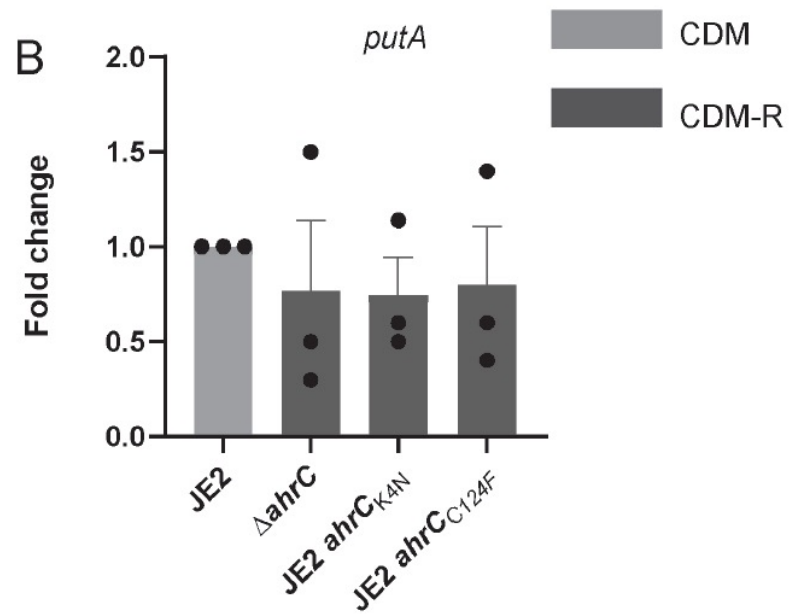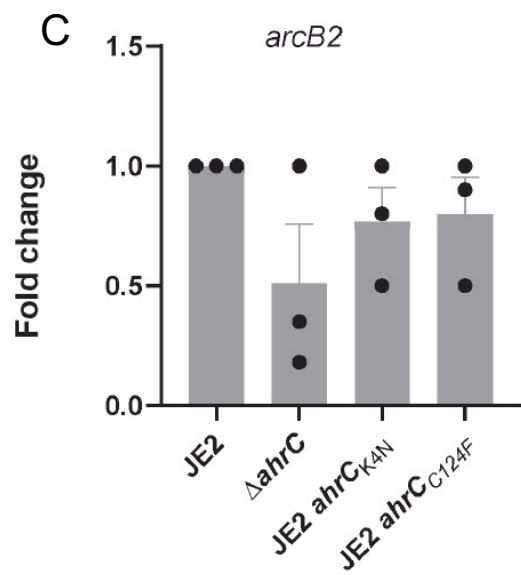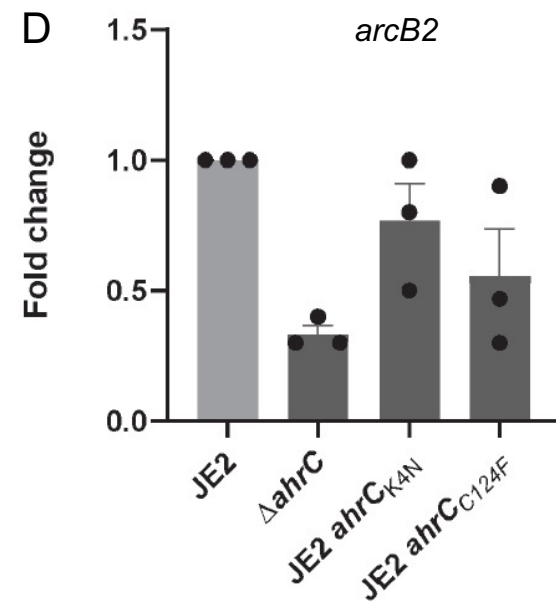

Supplement: mbio.00395-22-s0002.pdf [file mbio.00395-22-s0002.pdf]
